# Supplementary material for: ZIF-9(iii) nanosheets synthesized in ionic liquid/ethanol mixture for efficient photocatalytic hydrogen production
Source: Royal Society of Chemistry journal article supplement (doi:10.1039/d2nr03139f), 2022-01-01
Supplement: d2nr03139f1.pdf [file d2nr03139f1.pdf]

## Supplementary Materials for

### **ZIF-9(III) Nanosheets synthesized in Ionic Liquid/Ethanol**

### **Mixture for Efficient Photocatalytic Hydrogen Production**

Yanyue Wang,<sup>a,b</sup> Jianling Zhang,<sup>\*a,b</sup> Xiuyan Cheng,<sup>a,b</sup> Yufei Sha,<sup>a,b</sup> Mingzhao Xu,<sup>a,b</sup> Zhuizhui Su,<sup>a,b</sup> Jingyang Hu<sup>a,b</sup> and Lei Yao<sup>c</sup>

<sup>a</sup>Beijing National Laboratory for Molecular Sciences, CAS Key Laboratory of Colloid, Interface and Chemical Thermodynamics, CAS Research/Education Center for Excellence in Molecular Sciences, Institute of Chemistry, Chinese Academy of Sciences, Beijing 100190, P.R.China.

<sup>b</sup>School of Chemical Sciences, University of Chinese Academy of Sciences, Beijing 100049, P.R.China.

<sup>c</sup>Beijing Synchrotron Radiation Facility (BSRF), Institute of High Energy Physics, Chinese Academy of Sciences, Beijing 100049, P.R.China.

\*Correspondence to: zhangjl@iccas.ac.cn

## Results and Discussion

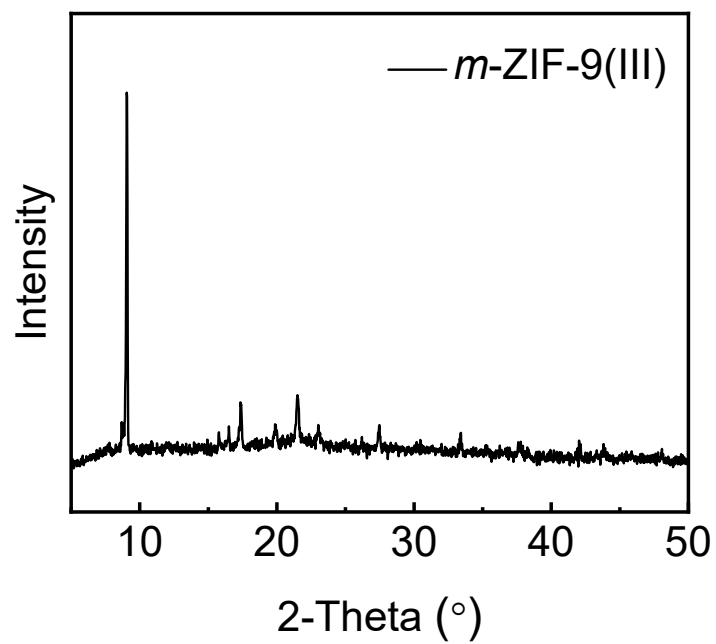

**Fig. S1.** XRD pattern of *m*-ZIF-9(III).

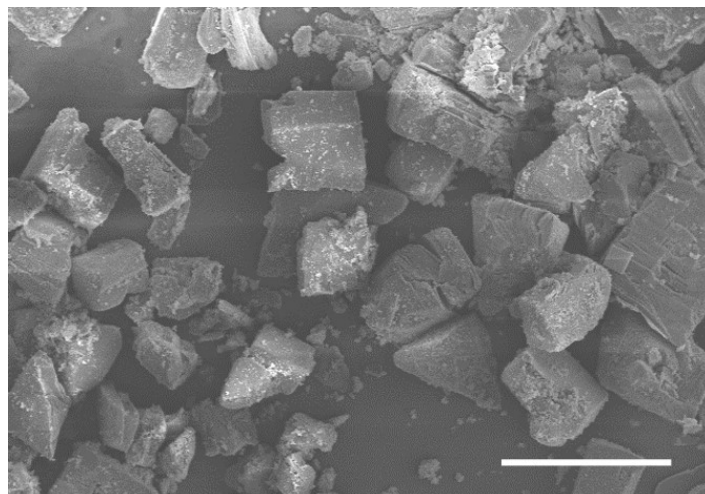

**Fig. S2.** SEM image of *m*-ZIF-9(III). Scale bar: 100  $\mu\text{m}$ .

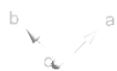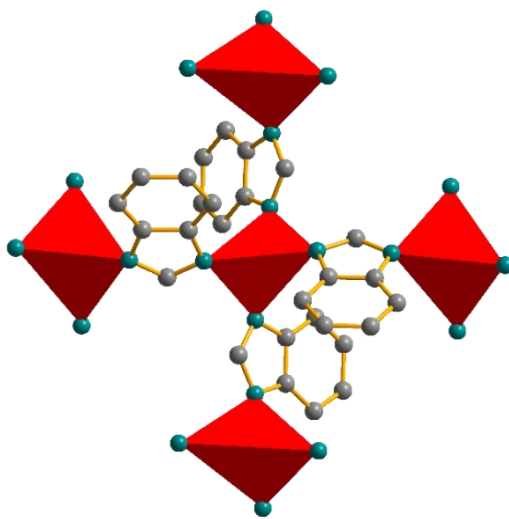

**Fig. S3.** CoN<sub>4</sub> tetrahedral (red) structure in ZIF-9(III).

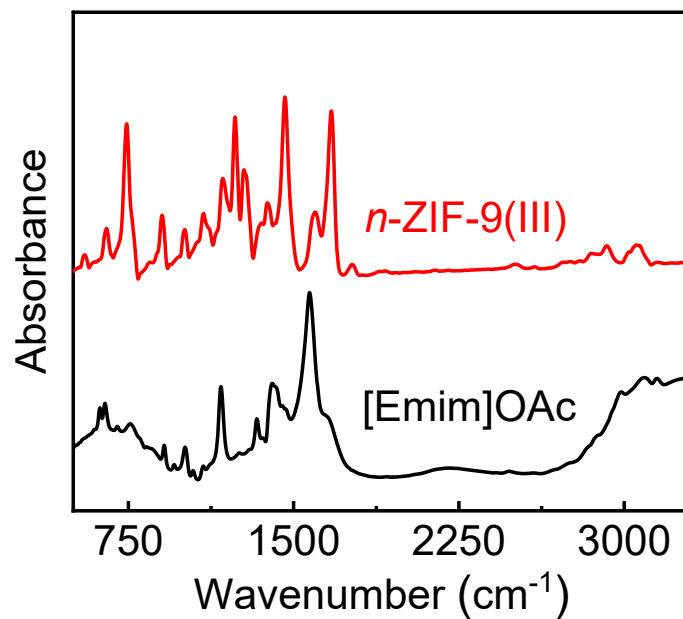

**Fig. S4.** FT-IR spectra of *n*-ZIF-9(III) and pure [Emim]OAc.

For *n*-ZIF-9(III), the absorptions at  $\approx 741$ , 1236, 1293, 1464 and 1675  $\text{cm}^{-1}$  can be assigned to C-H bending, C-C stretching, C-N stretching, C=C stretching and C=N stretching, respectively. The characteristic FT-IR vibrations of [Emim]OAc cannot be observed in the FT-IR spectrum of the *n*-ZIF-9(III), proving that [Emim]OAc is removed completely.

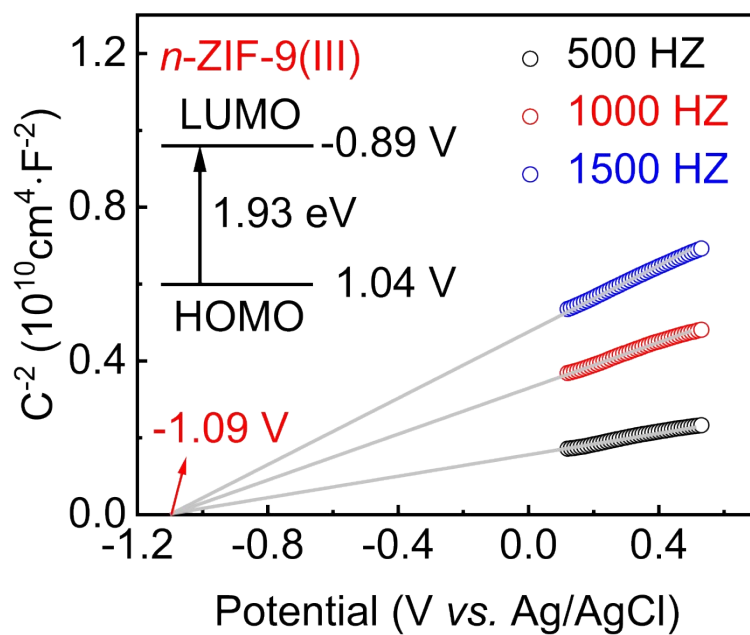

**Fig. S5.** Mott-Schottky plots of *n*-ZIF-9(III) in 0.2 M Na<sub>2</sub>SO<sub>4</sub> aqueous solution, with inset of energy diagram of the LUMO and HOMO levels of *n*-ZIF-9(III).

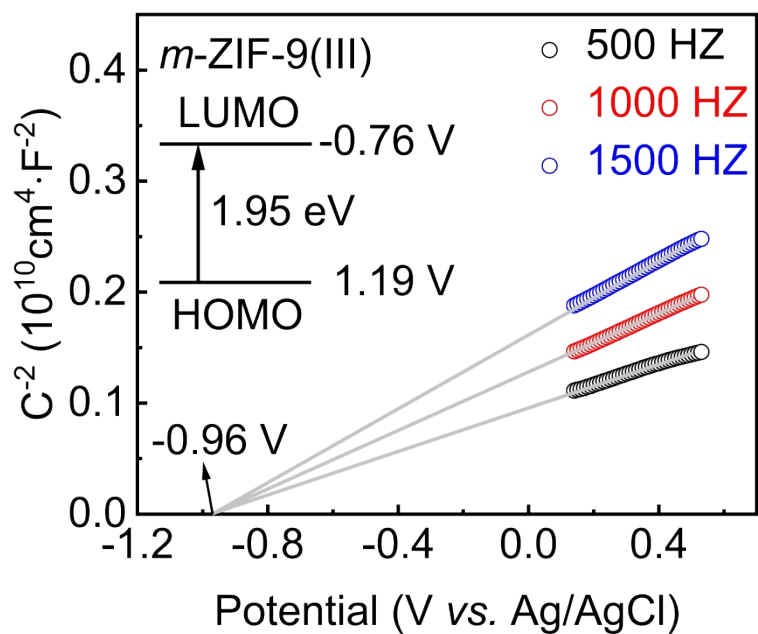

**Fig. S6.** Mott-Schottky plots of *m*-ZIF-9(III) in 0.2 M Na<sub>2</sub>SO<sub>4</sub> aqueous solution, with inset of energy diagram of the LUMO and HOMO levels of *m*-ZIF-9(III).

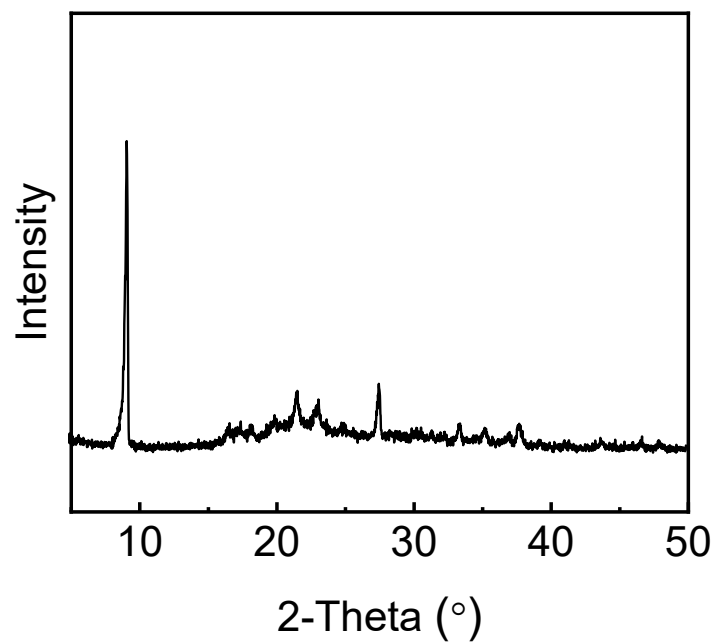

**Fig. S7.** XRD pattern of *n*-ZIF-9(III) after photocatalytic reaction.



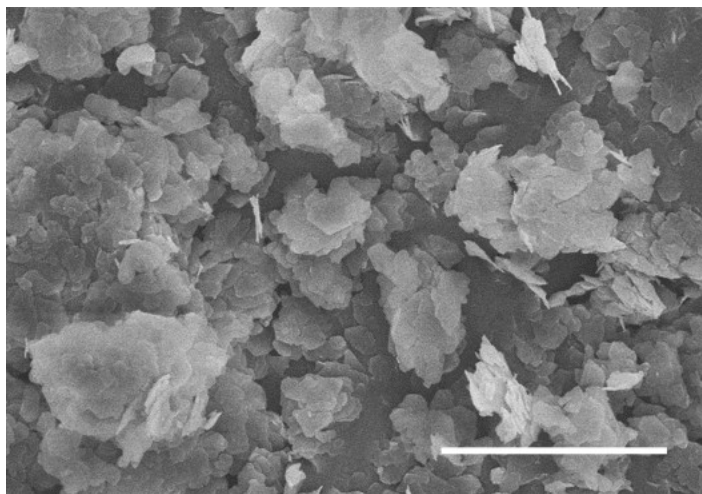

**Fig. S8.** SEM image of *n*-ZIF-9(III) after photocatalytic reaction. Scale bar: 20  $\mu\text{m}$ .

**Table S1.** Comparison of the reaction conditions and performances of MOF or MOF-based photocatalysts for photocatalytic H<sub>2</sub> production.

| Photocatalysts                                                            | Conditions<br>(Irradiation, Sacrificial agent,<br>Photosensitizer, Cocatalyst)                 | H <sub>2</sub> Production<br>Rate<br>(mmol g <sup>-1</sup> h <sup>-1</sup> ) | Ref.      |
|---------------------------------------------------------------------------|------------------------------------------------------------------------------------------------|------------------------------------------------------------------------------|-----------|
| MOF photocatalysts                                                        |                                                                                                |                                                                              |           |
| <i>n</i> -ZIF-9(III)                                                      | 300 W Xe lamp ( $\lambda > 420$ nm),<br>Triethanolamine, [Ru(bpy) <sub>3</sub> ] <sup>2+</sup> | 112.37                                                                       | This work |
| ZIF-67                                                                    | 450 nm LED light, Triethanolamine,<br>[Ru(bpy) <sub>3</sub> ] <sup>2+</sup>                    | 0.84                                                                         | [1]       |
| Wells-Dawson-type<br>polyoxometalates                                     | Visible light, Methanol, [Ru(bpy) <sub>3</sub> ] <sup>2+</sup>                                 | 3.55                                                                         | [2]       |
| Mo <sub>2</sub> S <sub>12</sub> @MIL-101(Al)                              | 300 W Xe lamp ( $\lambda > 420$ nm),<br>Triethanolamine, [Ru(bpy) <sub>3</sub> ] <sup>2+</sup> | 27.08                                                                        | [3]       |
| Ni@MOF-5                                                                  | 300 W Xe lamp ( $\lambda > 420$ nm),<br>Triethanolamine, Eosin Y, Ni nanoparticles             | 30.22                                                                        | [4]       |
| NiMo@MIL-101                                                              | 300 W Xe lamp ( $\lambda > 420$ nm),<br>Triethanolamine, Eosin Y, NiMo alloy<br>clusters       | 14.80                                                                        | [5]       |
| Pt@NH <sub>2</sub> -UiO-66                                                | 300 W Xe lamp ( $\lambda > 420$ nm), methanol,<br>Calix-3, Pt particles                        | 1.53                                                                         | [6]       |
| Pt@UiO-66(Zr)                                                             | 300 W Xe lamp ( $\lambda > 420$ nm),<br>Triethanolamine, Rhodamin B, Pt<br>nanoparticles       | 0.12                                                                         | [7]       |
| NH <sub>2</sub> -MIL-125(Ti)/CN/<br>Ni <sub>1.5,8</sub> Pd <sub>2.1</sub> | 300 W Xe lamp, Triethanolamine, Eosin Y,<br>NiPd nanoparticles                                 | 8.70                                                                         | [8]       |
| RCGO/U6N<br>(graphene wrapped<br>on UiO-66-NH <sub>2</sub> )              | 300 W Xe lamp ( $\lambda > 420$ nm),<br>Triethanolamine, Erythrosin B                          | 41.4                                                                         | [9]       |

|                                |                                                                   |      |      |
|--------------------------------|-------------------------------------------------------------------|------|------|
| Co(II)@MIL-125-NH <sub>2</sub> | 300 W Xe lamp ( $\lambda > 380$ nm),<br>Triethanolamine           | 0.55 | [10] |
| CdS/MIL-101(Cr)                | 300 W Xe lamp ( $\lambda > 420$ nm), Lactic<br>acid, Pt particles | 0.76 | [11] |
| Ni-TBAPy-NB (Ni<br>MOF)        | 300 W Xe lamp ( $\lambda > 420$ nm), ascorbic acid                | 5    | [12] |

---

## References

1. B. Pattengale, S. Yang, S. Lee, J. Huang, *ACS Catal.*, 2017, **7**, 8446-8453.
2. J. Tian, Z. Y. Xu, D. W. Zhang, H. Wang, S. H. Xie, D. W. Xu, Y. H. Ren, H. Wang, Y. Liu, Z. T. Li, *Nat. Commun.*, 2016, **7**, 11580.
3. H. Li, S. Yao, H.-L. Wu, J.-Y. Qu, Z.-M. Zhang, T.-B. Lu, W. Lin, E.-B. Wang, *Appl. Catal., B.*, 2018, **224**, 46-52.
4. W. Zhen, J. Ma, G. Lu, *Appl. Catal., B.*, 2016, **190**, 12-25.
5. W. Zhen, H. Gao, B. Tian, J. Ma, G. Lu, *ACS Appl. Mater. Interfaces.*, 2016, **8**, 10808-10819.
6. Y.-F. Chen, L.-L. Tan, J.-M. Liu, S. Qin, Z.-Q. Xie, J.-F. Huang, Y.-W. Xu, L.-M. Xiao, C.-Y. Su, *Appl. Catal., B.*, 2017, **206**, 426-433.
7. J. He, J. Wang, Y. Chen, J. Zhang, D. Duan, Y. Wang, Z. Yan, *Chem. Commun.*, 2014, **50**, 7063-7066.
8. J. Xu, J. Gao, C. Wang, Y. Yang, L. Wang, *Appl. Catal., B.*, 2017, **219**, 101-108.
9. Y. Wang, Y. Yu, R. Li, H. Liu, W. Zhang, L. Ling, W. Duan, B. Liu, *J. Mater. Chem. A.*, 2017, **5**, 20136-20140.
10. Z. Li, J.-D. Xiao, H.-L. Jiang, *ACS Catal.*, 2016, **6**, 5359-5365.
11. J. He, Z. Yan, J. Wang, J. Xie, L. Jiang, Y. Shi, F. Yuan, F. Yu, Y. Sun, *Chem. Commun.*, 2013, **49**, 6761-6763.
12. L. Liu, S. Du, X. Guo, Y. Xiao, Z. Yin, N. Yang, Y. Bao, X. Zhu, S. Jin, Z. Feng, F. Zhang, *J. Am. Chem. Soc.*, 2022, **144**, 2747-2754.
